# Supplementary material
Source: Springer Nature journal article supplement (https://www.springermedizin.de/resource/supplementary/12891_2008_601_MOESM3_ESM.pdf/9506326)

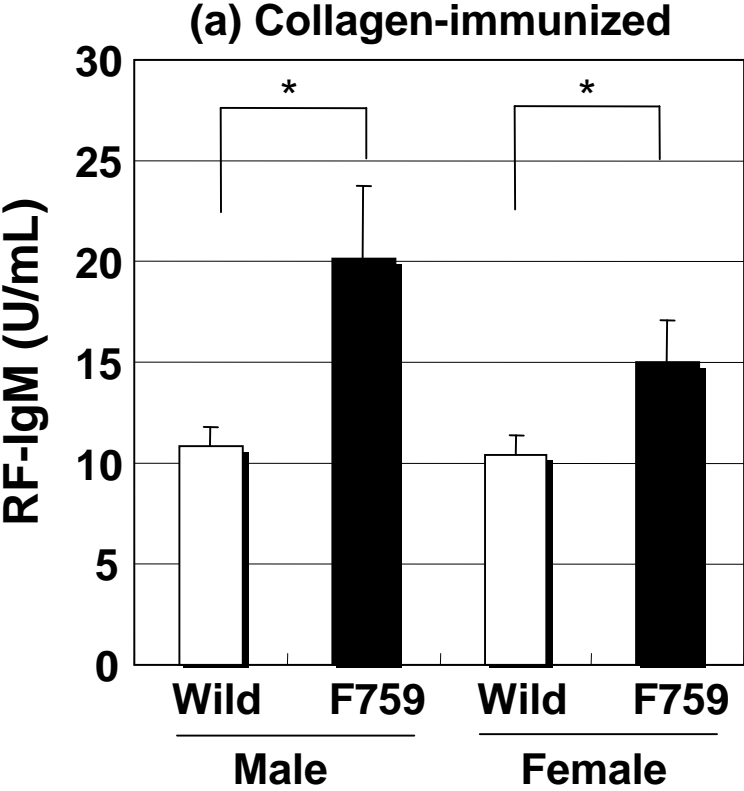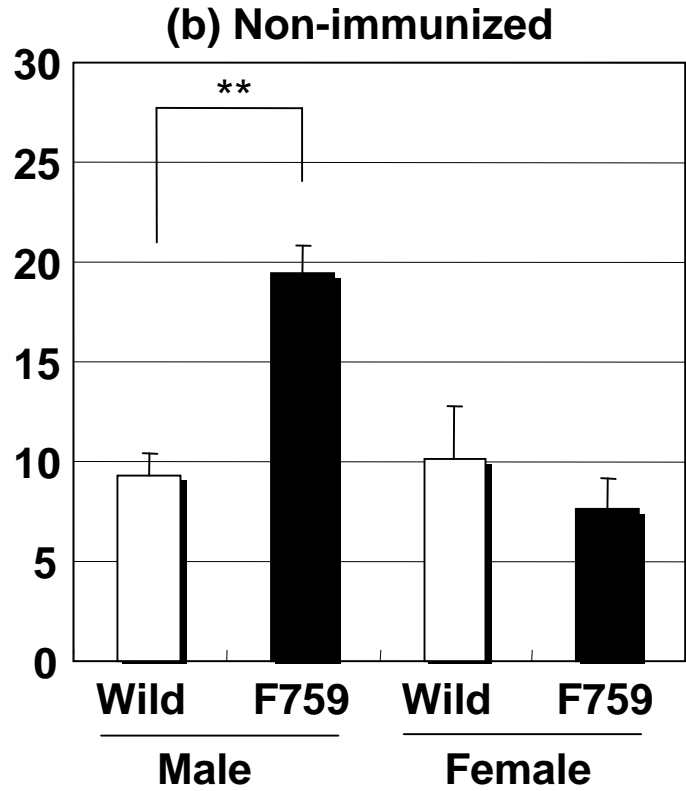

Supplement: MOESM3 [file 9506326]
